# Supplementary material for: Anticancer Effect of Deuterium Depleted Water - Redox Disbalance Leads to Oxidative Stress
Source: PubMed Central journal article supplement (PMC6885702; doi:10.1074/mcp.ra119.001455), 2019-09-13
Supplement: 144400_2_supp_382929_pwmgxf.pdf [file 144400_2_supp_382929_pwmgxf.pdf]

## **Anticancer effect of deuterium depleted water - redox disbalance leads to oxidative stress**

Xuepei Zhang, Massimiliano Gaetani, Alexey Chernobrovkin, Roman A. Zubarev\*

### ***Supplementary Figure captions:***

**Table S1.** Common identified proteins in protein abundances analysis.

**Table S2.** Top 50 up and down regulated proteins specific for DDW and the abundance ratios to control.

**Table S3.** STRING analysis result of top 50 up regulated proteins

**Table S4.** STRING analysis result of top 50 down regulated proteins

**Table S5.** Result of time course analysis.

**Table S6.** Time course analysis of proteins most regulated by MTX.

**Table S7.** Time course analysis of proteins most regulated by DDW.

**Table S8.** Time course analysis of proteins most regulated by PCTL.

**Table S9.** Common proteins identified in redox proteomics result.

**Table S10.** Common peptides identified in redox proteomics result.

**Table S11.** Top 20 oxidized and reduced proteins.

**Table S12.** Oxidation levels of p62 peptides in DDW vs NW.

**Table S13.** Common proteins in cells growing in NW or DDW medium in redox result.

**Table S14.** Common peptides in cells growing in NW or DDW medium in redox result.

**Table S15.** Result of TPP analysis.

**Table S16.** R analysis of TPP result.

**Table S17.** STRING analysis result of overlap top 50 up regulated proteins with disbalance in oxidation -reduction level or changes in stability.

**Table S18.** STRING analysis result of top 50 down regulated proteins with disbalance in oxidation-reduction level or changes in stability.

**Figure. S1.** Survival of A549 cell line grown in media with different deuterium concentrations from 17-150 ppm.

**Figure. S2.** DDW effect on cell proliferation and dynamic analysis of regulation of DDW on proteome abundance.

**Figure. S3.** Inhibitory curve of auranofin.

**Figure. S4.** Validation of DDW anticancer mechanism.

**Table S3. STRING analysis result of top 50 up regulated proteins**

|                         | Pathway ID | Pathway description | Observed gene count | False discovery rate |
|-------------------------|------------|---------------------|---------------------|----------------------|
| Cellular Component (GO) | GO:0005776 | autophagosome       | 4                   | 0.02                 |
|                         | GO:0044754 | autolysosome        | 2                   | 0.0407               |
| UniProt Keywords        | KW-0131    | Cell cycle          | 9                   | 0.0047               |
|                         | KW-0832    | Ubl conjugation     | 16                  | 0.0135               |

**Table S4. STRING analysis result of top 50 down regulated proteins**

|                         | Pathway ID | Pathway description                                                              | Observed gene count | False discovery rate |
|-------------------------|------------|----------------------------------------------------------------------------------|---------------------|----------------------|
| Biological Process (GO) | GO.0009165 | nucleotide biosynthetic process                                                  | 6                   | 0.0325               |
|                         | GO.0010224 | response to UV-B                                                                 | 3                   | 0.0325               |
| Molecular Function (GO) | GO.0004748 | ribonucleoside-diphosphate reductase activity, thioredoxin disulfide as acceptor | 2                   | 0.0183               |
|                         | GO.0016491 | oxidoreductase activity                                                          | 9                   | 0.0183               |
| Cellular Component (GO) | GO.0005829 | cytosol                                                                          | 20                  | 0.0122               |
|                         | 4115       | p53 signaling pathway                                                            | 6                   | 3.22E-06             |
|                         | 480        | Glutathione metabolism                                                           | 4                   | 0.000816             |
| KEGG Pathways           | 1100       | Metabolic pathways                                                               | 10                  | 0.0242               |
|                         | 5161       | Hepatitis B                                                                      | 4                   | 0.0242               |
|                         | 5214       | Glioma                                                                           | 3                   | 0.0242               |

**Table S11. Top 20 oxidized and reduced proteins.** OX - oxidation percentage, C – NW, A – auronafin, D – DDW.

| Oxidized or reduced | Gene names | Oxidation percentage (OX) |        |        |        |        |        |        |        |        | Rank |
|---------------------|------------|---------------------------|--------|--------|--------|--------|--------|--------|--------|--------|------|
|                     |            | A-OX-1                    | A-OX-2 | A-OX-3 | C-OX-1 | C-OX-2 | C-OX-3 | D-OX-1 | D-OX-2 | D-OX-3 |      |
| Oxidized            | HNRNPA1    | 0.4                       | 0.6    | 2.8    | 3.0    | 3.6    | 2.5    | 11.2   | 11.5   | 11.0   | 1    |
|                     | RPAP3      | 2.2                       | 3.2    | 5.3    | 12.1   | 4.9    | 12.1   | 42.3   | 33.6   | 42.9   | 2    |
|                     | p62        | 13.0                      | 11.7   | 10.8   | 16.1   | 18.5   | 19.7   | 34.5   | 35.7   | 34.5   | 3    |
|                     | RPL32      | 1.5                       | 7.7    | 6.4    | 8.2    | 4.4    | 3.5    | 30.8   | 20.7   | 28.5   | 4    |
|                     | CA12       | 57.7                      | 60.2   | 57.3   | 65.4   | 61.8   | 61.6   | 76.3   | 75.2   | 77.0   | 5    |
|                     | DDX39B     | 3.2                       | 3.3    | 4.9    | 4.0    | 3.7    | 5.1    | 8.5    | 7.4    | 8.3    | 6    |
|                     | PACSLIN2   | 16.8                      | 12.8   | 14.1   | 16.5   | 14.4   | 9.9    | 25.8   | 27.2   | 24.9   | 7    |
|                     | ANXA2      | 2.7                       | 1.5    | 2.4    | 5.1    | 5.9    | 5.7    | 12.1   | 12.2   | 13.6   | 8    |
|                     | FKBP4      | 6.0                       | 6.2    | 6.8    | 7.0    | 8.0    | 7.4    | 16.5   | 23.7   | 16.3   | 9    |
|                     | PSMD4      | 4.1                       | 9.5    | 7.1    | 2.0    | 6.2    | 10.2   | 19.3   | 20.1   | 22.1   | 10   |
|                     | RFC2       | 9.1                       | 9.3    | 14.9   | 10.0   | 6.0    | 13.6   | 24.9   | 31.0   | 25.0   | 11   |
|                     | SARS2      | 1.2                       | 2.3    | 4.2    | 1.2    | 1.8    | 1.9    | 13.3   | 17.5   | 9.5    | 12   |
|                     | MYO1B      | 7.2                       | 8.2    | 7.9    | 7.4    | 9.5    | 9.6    | 15.0   | 12.8   | 16.8   | 13   |
|                     | ACTR2      | 8.7                       | 5.5    | 5.2    | 4.2    | 6.1    | 10.9   | 24.1   | 16.5   | 24.1   | 14   |
|                     | HSPA9      | 4.6                       | 6.3    | 9.1    | 12.6   | 7.0    | 7.4    | 19.5   | 17.6   | 21.9   | 15   |
|                     | FSCN1      | 3.5                       | 6.0    | 6.1    | 10.5   | 10.0   | 11.7   | 21.5   | 19.2   | 23.0   | 16   |
|                     | GSK3A      | 4.9                       | 2.3    | 8.1    | 10.7   | 8.0    | 9.5    | 25.8   | 17.9   | 26.2   | 17   |
|                     | CTPS1      | 7.1                       | 7.9    | 8.4    | 7.8    | 7.1    | 7.7    | 15.4   | 12.0   | 11.4   | 18   |
|                     | TIPRL      | 4.3                       | 6.5    | 6.9    | 6.4    | 9.5    | 6.0    | 15.9   | 12.6   | 13.1   | 19   |
|                     | XPO5       | 7.6                       | 9.6    | 10.8   | 1.7    | 3.8    | 5.8    | 30.1   | 18.3   | 27.8   | 20   |
| Reduced             | ITGAV      | 67.9                      | 68.2   | 67.4   | 72.1   | 69.0   | 72.0   | 51.6   | 59.3   | 53.7   | 1    |
|                     | CELF1      | 23.2                      | 14.8   | 25.5   | 25.9   | 22.9   | 26.8   | 5.6    | 8.8    | 6.8    | 2    |
|                     | GLG1       | 69.5                      | 66.9   | 74.3   | 57.8   | 59.9   | 63.3   | 45.3   | 43.4   | 43.2   | 3    |
|                     | EIF4G2     | 15.0                      | 14.3   | 16.6   | 7.9    | 18.2   | 17.5   | 4.5    | 2.7    | 3.6    | 4    |
|                     | JAG1       | 84.3                      | 83.3   | 94.9   | 74.0   | 80.8   | 79.7   | 61.8   | 36.6   | 62.2   | 5    |
|                     | UBE2M      | 11.4                      | 17.6   | 16.8   | 10.9   | 11.1   | 15.3   | 3.9    | 2.4    | 8.1    | 6    |
|                     | TSPAN14    | 74.7                      | 73.6   | 82.3   | 63.6   | 42.2   | 48.2   | 30.9   | 24.2   | 26.7   | 7    |
|                     | EWSR1      | 9.8                       | 7.3    | 12.9   | 7.4    | 8.8    | 8.6    | 3.7    | 2.4    | 5.9    | 8    |
|                     | EPHA2      | 73.8                      | 75.8   | 76.4   | 65.5   | 66.4   | 66.3   | 53.9   | 63.0   | 54.9   | 9    |
|                     | DIS3       | 16.8                      | 26.7   | 22.3   | 18.6   | 19.2   | 21.3   | 13.2   | 7.3    | 14.2   | 10   |
|                     | ASNS       | 23.0                      | 22.5   | 26.6   | 11.4   | 16.8   | 12.1   | 4.9    | 2.5    | 7.3    | 11   |
|                     | HNRNPF     | 6.8                       | 10.0   | 16.8   | 16.0   | 16.9   | 17.3   | 2.3    | 5.4    | 4.8    | 12   |
|                     | SMC1A      | 20.0                      | 22.7   | 23.5   | 15.5   | 12.5   | 13.6   | 8.7    | 7.3    | 7.4    | 13   |
|                     | BSG        | 51.0                      | 51.0   | 46.0   | 78.1   | 80.7   | 87.0   | 23.5   | 18.4   | 35.5   | 14   |
|                     | ALCAM      | 79.9                      | 78.6   | 87.2   | 35.9   | 49.3   | 53.9   | 22.6   | 20.1   | 23.8   | 15   |
|                     | LMAN2      | 48.5                      | 44.1   | 53.2   | 40.9   | 44.4   | 41.3   | 38.6   | 28.2   | 35.7   | 16   |
|                     | RPL36A     | 7.3                       | 7.1    | 8.2    | 4.8    | 6.9    | 8.2    | 4.7    | 3.0    | 5.2    | 17   |
|                     | DDB1       | 6.7                       | 9.3    | 6.3    | 8.7    | 5.5    | 7.9    | 4.0    | 3.1    | 5.5    | 18   |
|                     | ERGIC3     | 76.2                      | 78.2   | 81.0   | 48.6   | 53.2   | 49.4   | 35.8   | 33.1   | 37.1   | 19   |
|                     | RPS15A     | 10.5                      | 8.9    | 15.1   | 13.1   | 12.1   | 11.6   | 8.1    | 6.0    | 8.8    | 20   |

**Table S12. Oxidation levels of p62 peptides in DDW vs NW.**

| Sequence | Mass    | Charges | Score  | Peptide number |     | Oxidation percentage (%) |       |       |       |       |       |          |
|----------|---------|---------|--------|----------------|-----|--------------------------|-------|-------|-------|-------|-------|----------|
|          |         |         |        | NW             | DDW | NW-1                     | NW-2  | NW-3  | DDW-1 | DDW-2 | DDW-3 | p value  |
| 23-46    | 2453.99 | 5;6     | 114.63 | 1              | 1   | 13.53                    | 9.45  | 11.73 | 18.83 | 17.62 | 18.51 | 0.005446 |
| 119-139  | 2080.96 | 5       | 94.632 | 1              | 1   | 21.79                    | 31.26 | 30.06 | 56.40 | 56.32 | 54.89 | 0.000732 |
| 151-166  | 1719.66 | 5;6     | 96.208 | 1              | 1   | 15.99                    | 21.19 | 22.08 | 42.50 | 41.99 | 45.63 | 0.000437 |

**Table S17. STRING analysis result of overlap top 50 up regulated proteins with disbalance in oxidation -reduction level or changes in stability**

|               | Pathway ID | Pathway description  | Observed gene count | False discovery rate |
|---------------|------------|----------------------|---------------------|----------------------|
| KEGG Pathways | 5203       | Viral carcinogenesis | 4                   | 0.00738              |

**Table S18. STRING analysis result of top 50 down regulated proteins with disbalance in oxidation-reduction level or changes in stability**

|                         | Pathway ID | Pathway description                                                              | Observed gene count | False discovery rate |
|-------------------------|------------|----------------------------------------------------------------------------------|---------------------|----------------------|
| Molecular Function (GO) | GO.0016491 | oxidoreductase activity                                                          | 8                   | 0.00167              |
|                         | GO.0004748 | ribonucleoside-diphosphate reductase activity, thioredoxin disulfide as acceptor | 2                   | 0.00407              |
|                         | GO.0003824 | catalytic activity                                                               | 16                  | 0.00774              |
| KEGG Pathways           | 480        | Glutathione metabolism                                                           | 4                   | 8.55E-05             |
|                         | 4115       | p53 signaling pathway                                                            | 4                   | 0.000144             |
|                         | 1100       | Metabolic pathways                                                               | 8                   | 0.00326              |
|                         | 240        | Pyrimidine metabolism                                                            | 3                   | 0.0153               |



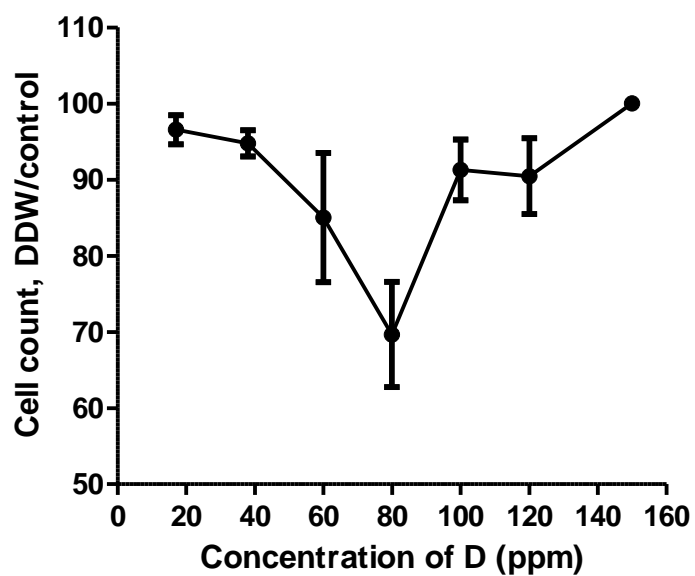

**FIG. S1.** Survival of A549 cell line grown in media with different deuterium concentrations from 17-150 ppm

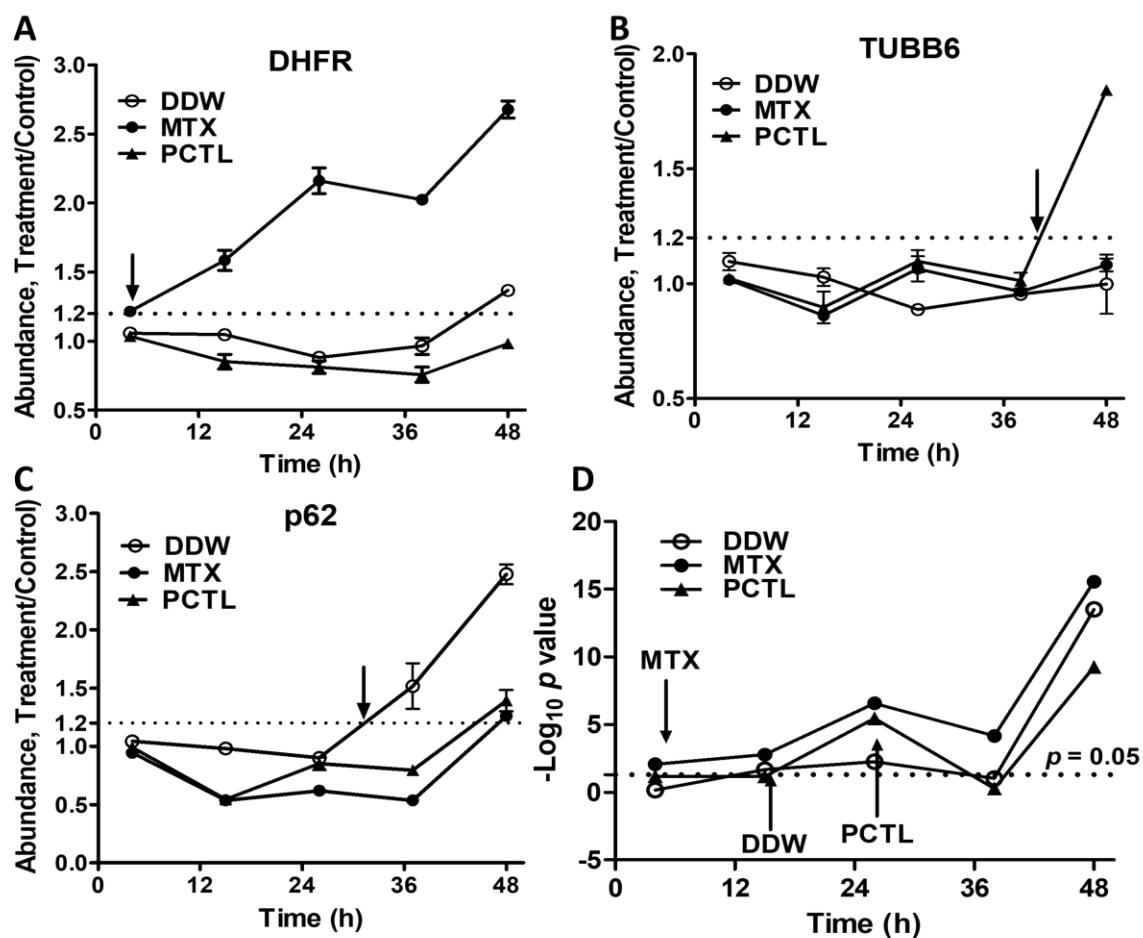

**FIG. S2.** DDW effect on cell proliferation and dynamic analysis of regulation of DDW on proteome abundance. Abundance dynamic changes of DHFR (**A**), TUBB6 (**B** and p62 (**C**)). **D** Statistical significance analysis of top 50 up and down regulated proteins in FITeXP for each treatment at each time point. Error bars represent SEM,  $n = 2$ .

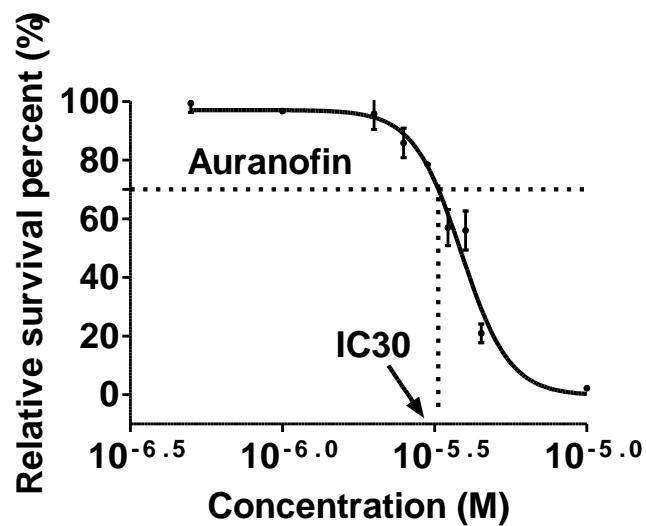

**FIG. S3.** Inhibitory curve of auranofin using Prism following logarithmic transformation of concentration and fitting curve using equation of log(inhibitor) vs. response – Variable slop (four parameters). Error bars represent SEM, n = 3.

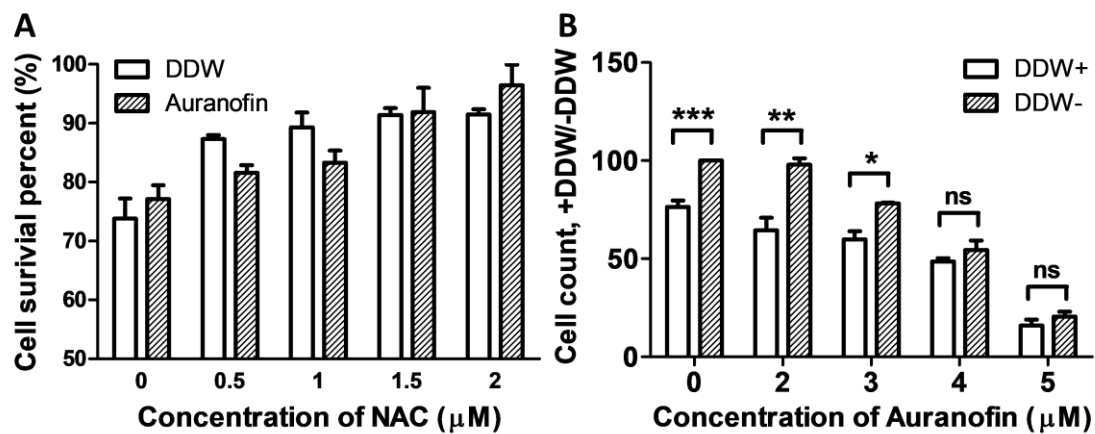

**FIG. S4. Validation of DDW anticancer mechanism.** *A*, Combined effect of DDW and Auranofin on cell survival. *B*, Effect of DDW and Auranofin on cell survival in presence of NAC. Error bars represent SEM with triplicates measurements, ns  $P > 0.05$ , \* $P < 0.05$ , \*\* $P < 0.01$ , \*\*\* $P < 0.005$  (two-tailed unpaired t-tests).
